# Supplementary material for: mRNA vaccine effectiveness against COVID-19-related hospitalisations and deaths in older adults: a cohort study based on data linkage of national health registries in Portugal, February to August 2021
Source: PubMed Central journal article supplement (PMC8462036; doi:10.2807/1560-7917.es.2021.26.38.2100833), 2021-09-23
Supplement: 21-00833_NUNES_supplement.pdf [file 21-00833_NUNES_supplement.pdf]

1 **Supplementary material**

2 This supplementary material is hosted by Eurosurveillance as supporting information alongside the article  
3 mRNA vaccines effectiveness against COVID-19 hospitalizations and deaths in older adults: a cohort study  
4 based on data-linkage of national health registries in Portugal on behalf of the authors who remain  
5 responsible for the accuracy and appropriateness of the content. The same standards for ethics, copyright,  
6 attributions and permissions as for the article apply. Supplements are not edited by Eurosurveillance and the  
7 journal is not responsible for the maintenance of any links or email addresses provided therein.

8

9 Supplementary Table S1 – Study period times (days) and date of last event for COVID-19

10 hospitalization and deaths - cohort 65-79 and 80 yo or older.

|                 | Start      | End        | Duration (days) |
|-----------------|------------|------------|-----------------|
| 65-79 Cohort    |            |            |                 |
| Hospitalization | 30.03.2021 | 11.08.2021 | 134             |
| Deaths          | 30.03.2021 | 09.08.2021 | 132             |
| 80 + Cohort     |            |            |                 |
| Hospitalization | 02.02.2021 | 11.08.2021 | 190             |
| Deaths          | 02.02.2021 | 07.08.2021 | 186             |

11

12

13 Supplementary Table S2– Distribution of time (days) since second dose for cohort 65-79 and ≥80 yo.

|                 | Median | Interquartile Range<br>(IQR) | Minimum-Maximum |
|-----------------|--------|------------------------------|-----------------|
| 65-79 yo Cohort | 78     | 71 to 94                     | 1 - 113         |
| ≥80 yo Cohort   | 125    | 112 to 145                   | 1 - 168         |

14

15

16

17

18

19 Supplementary Table S3 – Comparison between the age group, sex and region distribution of  
20 the individuals included in the 65-79 age cohort and the Portuguese population estimates  
21 (Statistics Portugal, 2020 population estimates).

|                 | Cohort (%)     | Population (%) |
|-----------------|----------------|----------------|
| <hr/>           |                |                |
| 65-79 yo cohort |                |                |
| <hr/>           |                |                |
| Age group       |                |                |
| 65-69           | 341,953 (38.9) | 602,210 (38.4) |
| 70-74           | 298,253 (34.0) | 536,388 (34.2) |
| 75-79           | 238,283 (27.1) | 428,706 (27.4) |
| Sex, male       | 385,128 (43.8) | 694,974 (44.3) |
| <hr/>           |                |                |
| ≥80 yo cohort   |                |                |
| <hr/>           |                |                |
| Age group       |                |                |
| 80-84           | 232,429 (50.4) | 337797 (51.0)  |
| 85+             | 228,391 (49.6) | 324027 (49.0)  |
| Sex, male       | 186,014 (40.4) | 239,436 (36.2) |
| <hr/>           |                |                |

22

23

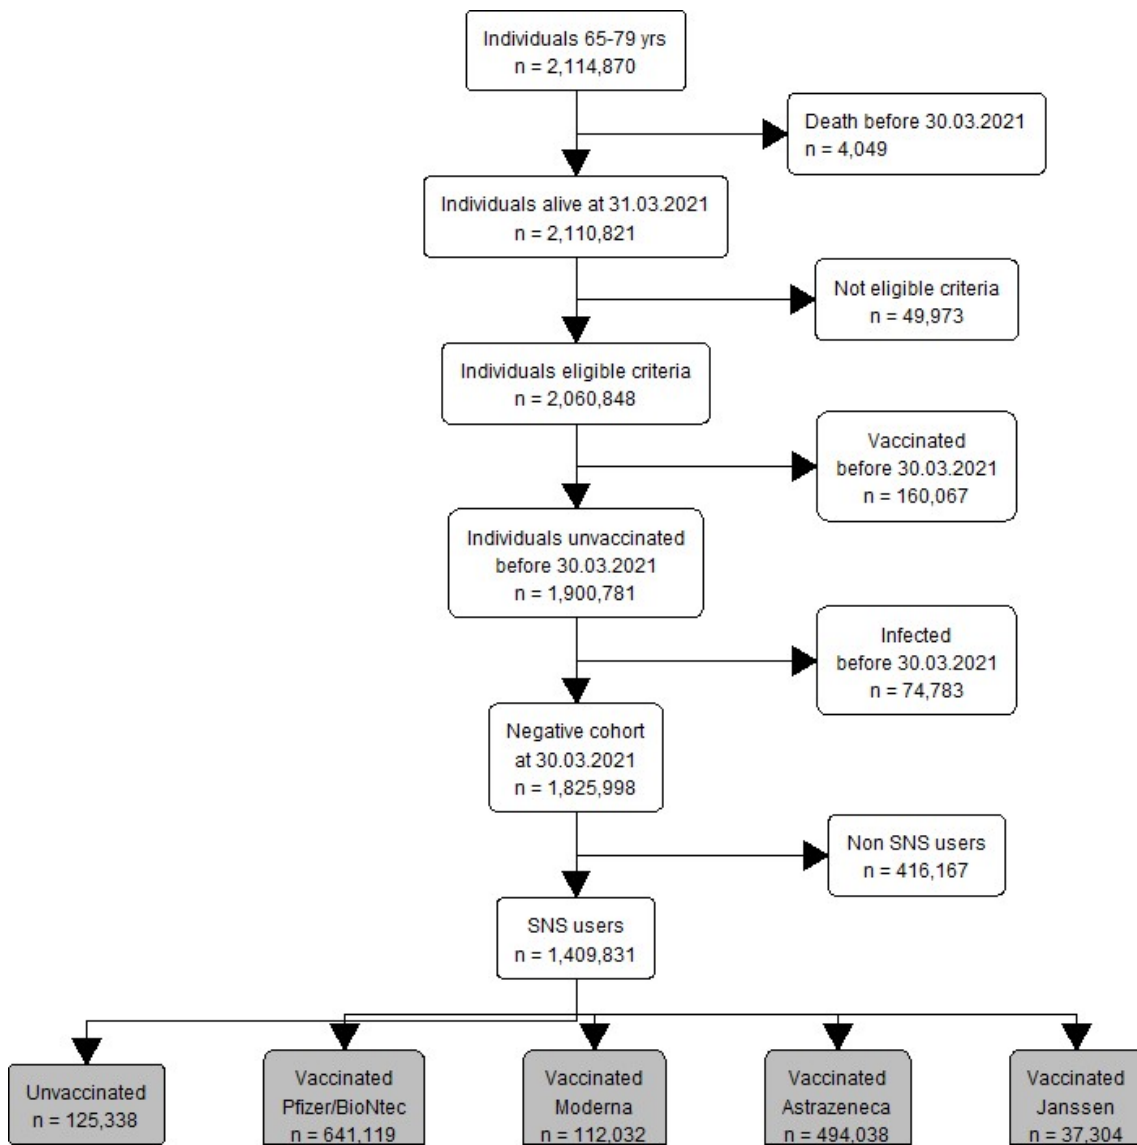

25

26 Supplementary Figure S1 – Participants selection flowcharts 65-79 years old cohort

27

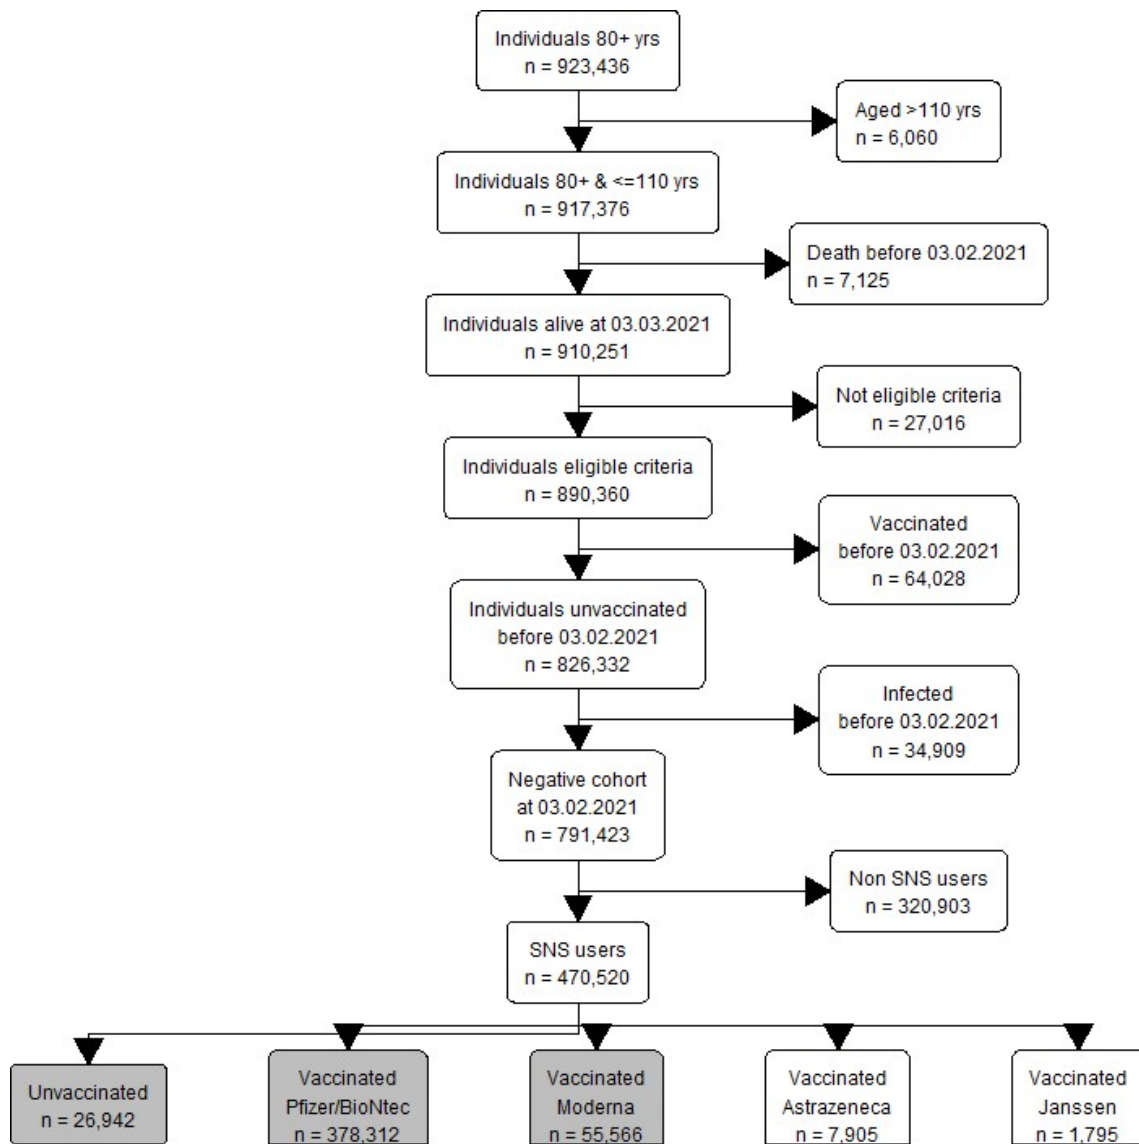

28

29

30 Supplementary Figure S2 - Participants selection flowcharts  $\geq 80$  years old cohort

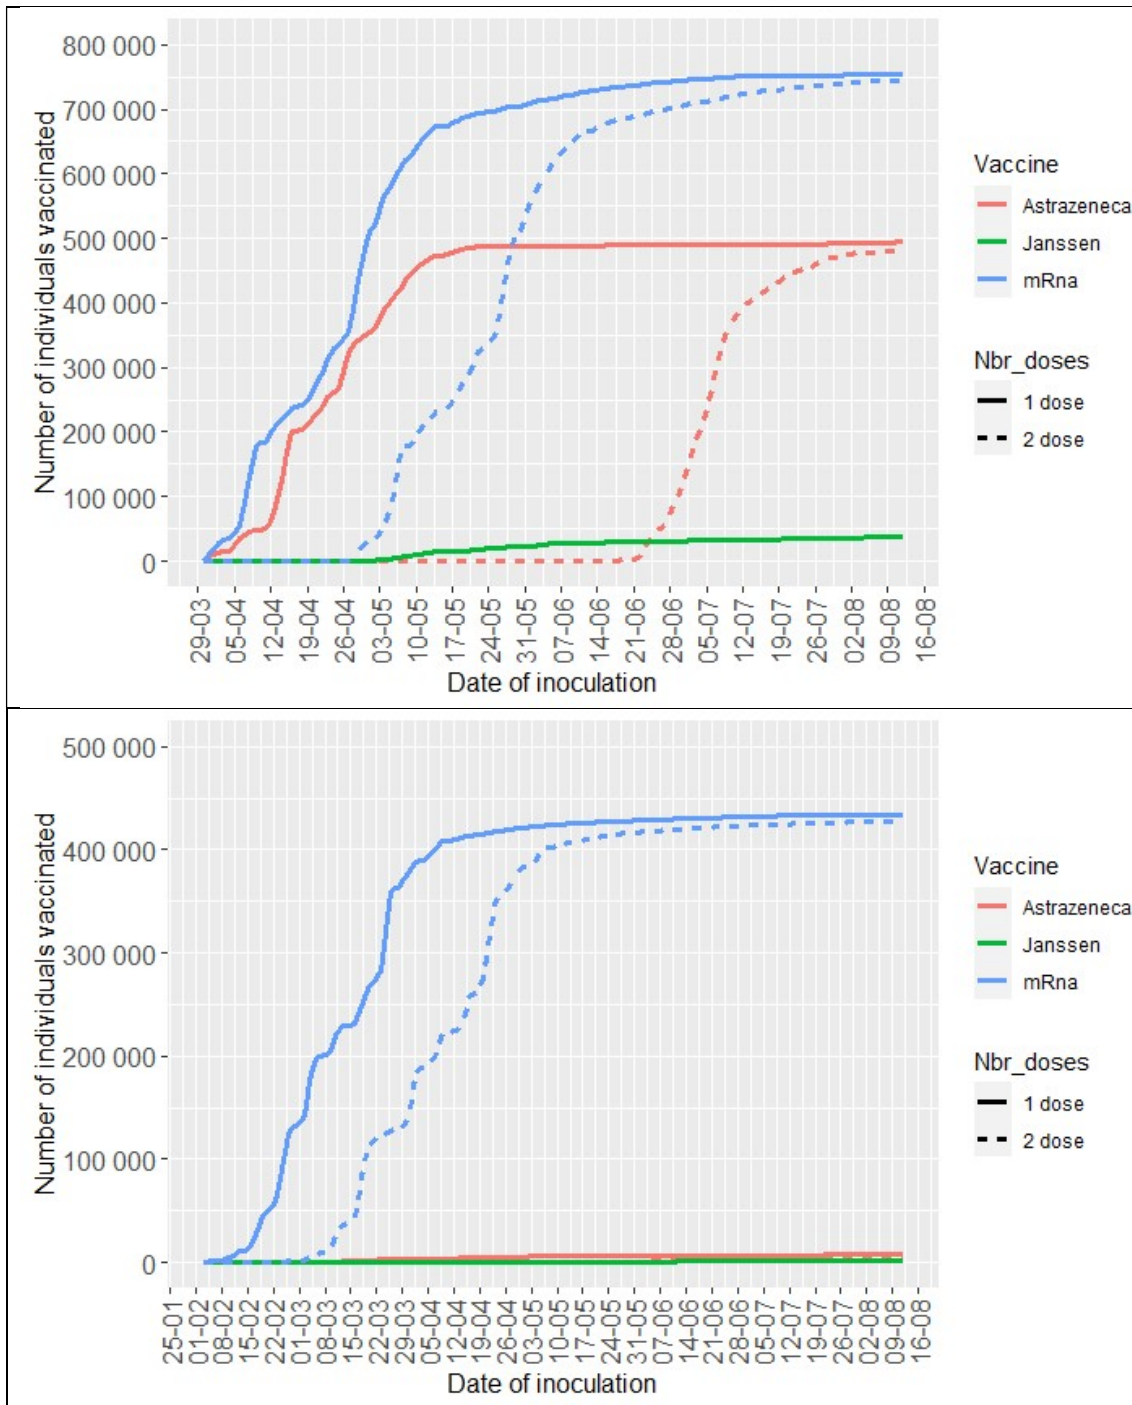

31  
 32 Supplementary Figure S3– Daily accumulated number of individuals vaccinated with  
 33 mRNA vaccines, according to the number of doses for the 65-79 age cohort (upper  
 34 panel) and  $\geq 80$  years old cohort (lower panel).  
 35

36  
37

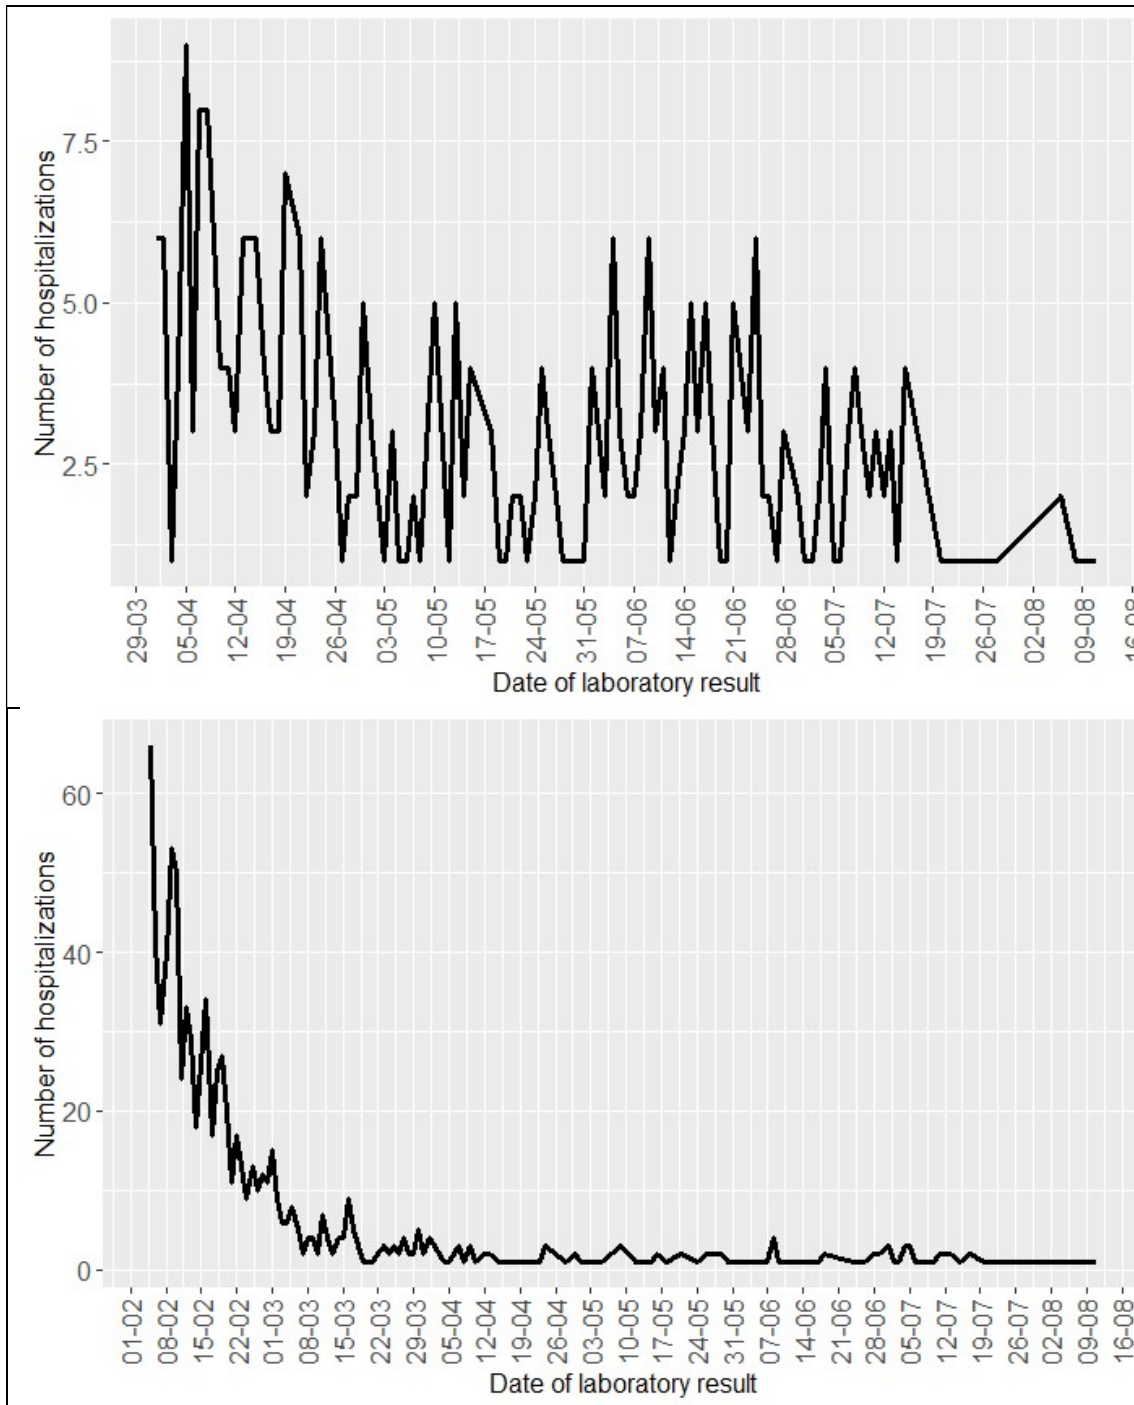

38 Supplementary Figure S4 – Daily number of COVID-19 hospitalizations according to  
39 date of SARS-CoV-2 infection diagnosis for 65 to 79 cohort (upper panel) and ≥80  
40 years old cohort (lower panel)  
41

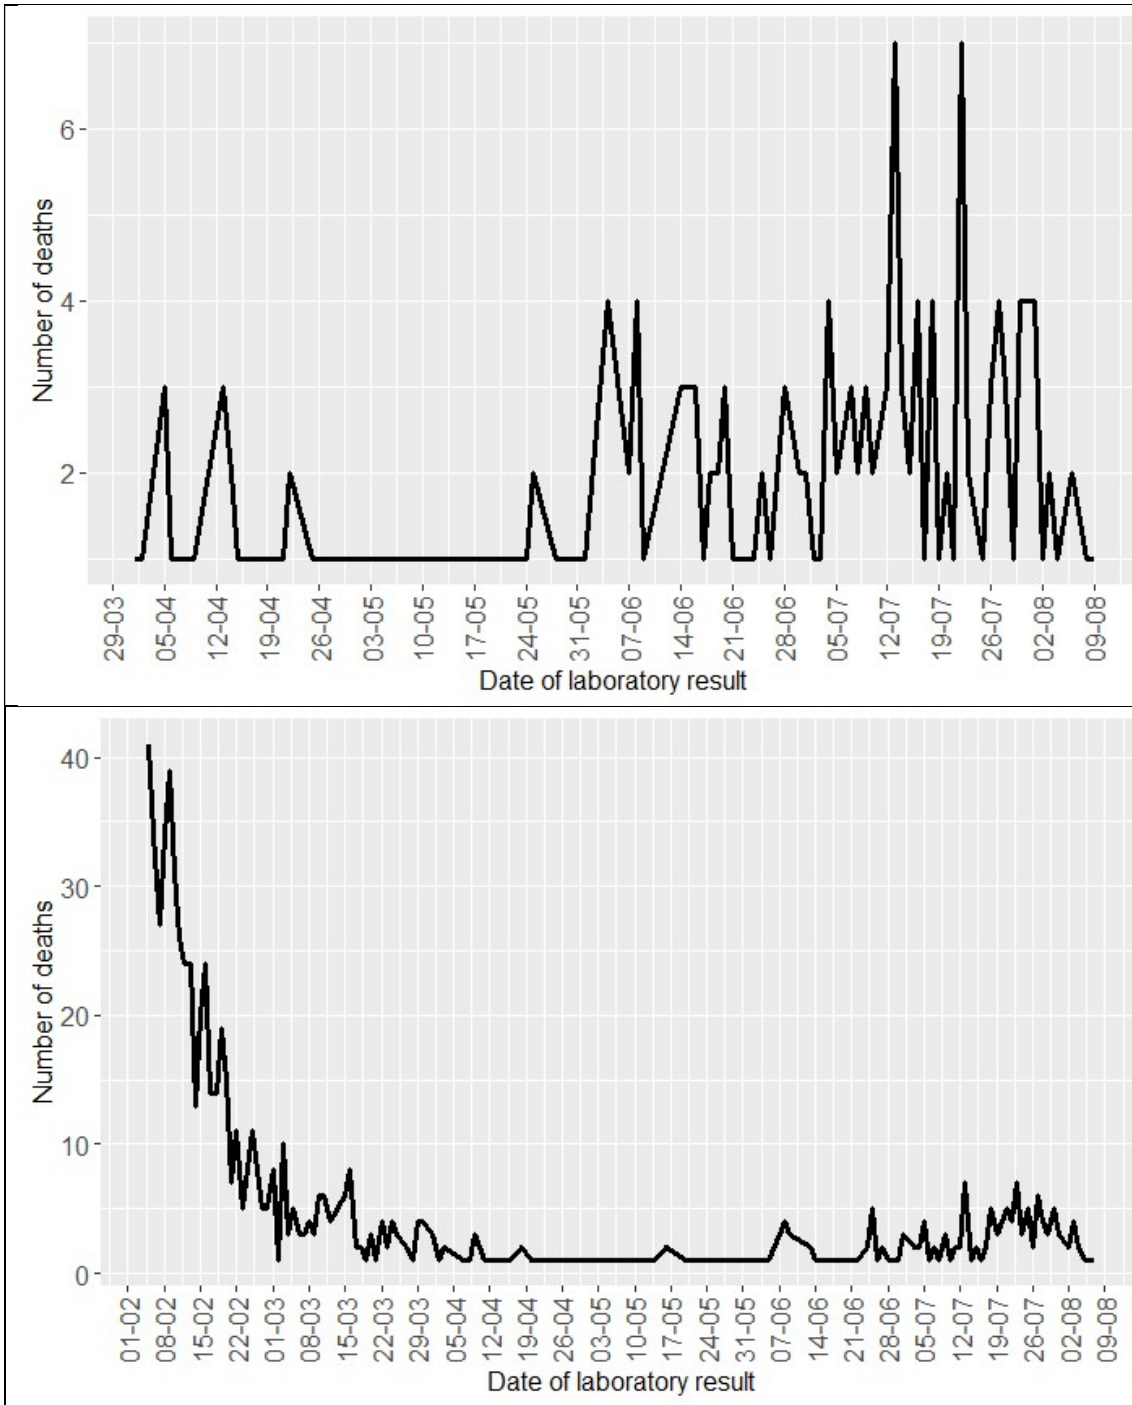

42 Supplementary Figure S5 – Daily number of COVID-19 related deaths according to  
 43 date SARS-CoV-2 infection diagnosis for 65 to 79 cohort (upper panel) and  $\geq 80$  years  
 44 old (lower panel)
